# Supplementary material
Source: PubMed Central journal article supplement (PMC4499771)
Supplement: Supp_Figure2.pdf [file Supp_Figure2.pdf]

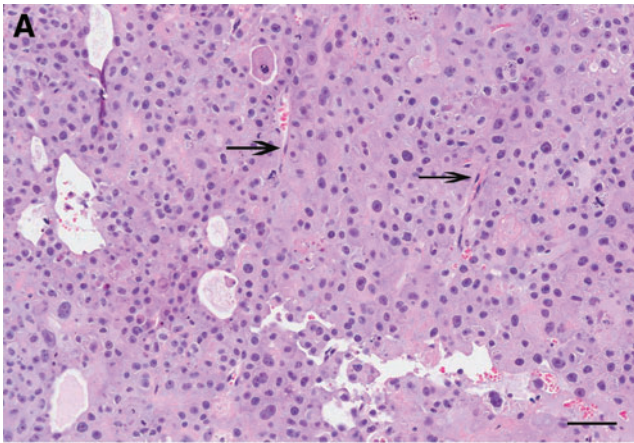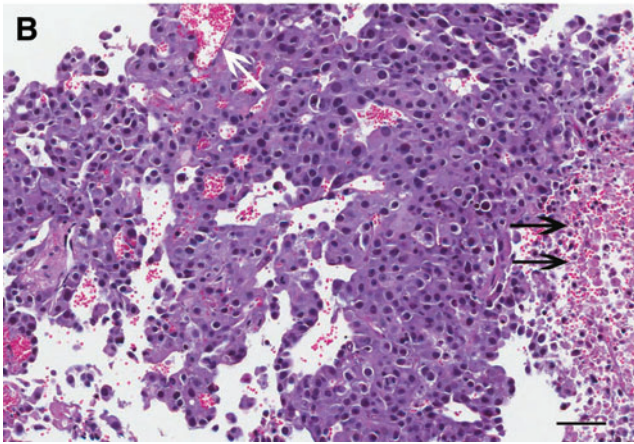

**SUPPLEMENTARY FIG. S2.** Hematoxylin and eosin (H and E) staining of human xenografts. (**A**, **B**) H and E staining of human xenografts produced by the injection of the cloned CD34+ LCSC exhibits the typical histologic features of human liver carcinomas (HLCs); there are polygonal cells with pleomorphic nuclei in cells with distinct cell borders, and nucleus:cytoplasm (N:C) ratios are increased and nuclei are hyperchromatic with prominent nucleoli. The presence of endothelial cells lining the sinusoids is one histopathologic feature of HLCs (**A**, *black arrow*). HLCs usually contain small or large foci of necrosis (**B**, *double black arrow*) and dilated blood vessels (**B**, *white arrow*). Scale bar: 100  $\mu$ m.
