# Supplementary material
Source: PubMed Central journal article supplement (PMC4499771)
Supplement: Supp_Figure5.pdf [file Supp_Figure5.pdf]

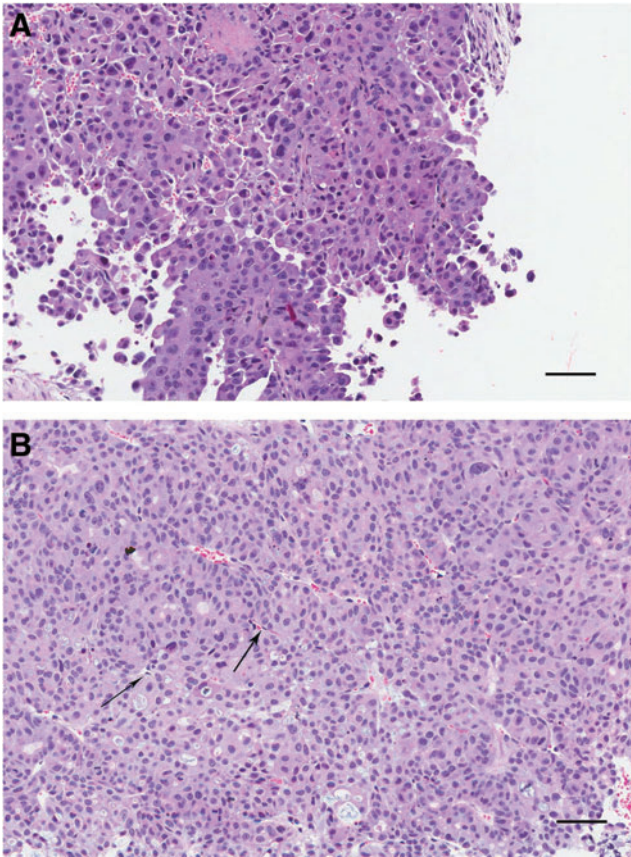

**SUPPLEMENTARY FIG. S5.** H and E staining of human xenografts. (**A, B**) H and E staining of human xenografts produced by the injection of the sorted CD34+ PLC exhibits the typical histologic features of HLC; there are polygonal cells with pleomorphic nuclei in cells with distinct cell borders, N:C ratios are increased, and nuclei are hyperchromatic with prominent nucleoli (**A, B**). The presence of endothelial cells lining the sinusoids is one histopathologic feature of HCCs (**B, black arrow**).
