# Supplementary material
Source: PubMed Central journal article supplement (PMC4499771)
Supplement: Supp_Figure6.pdf [file Supp_Figure6.pdf]

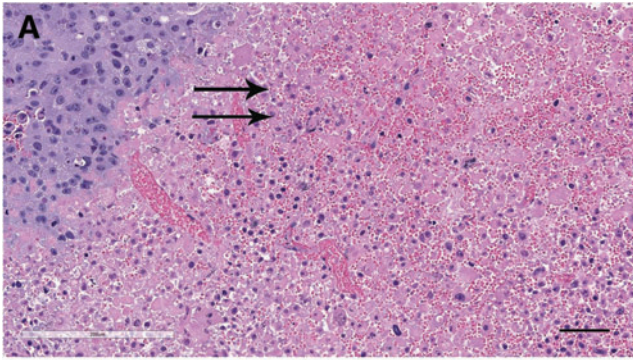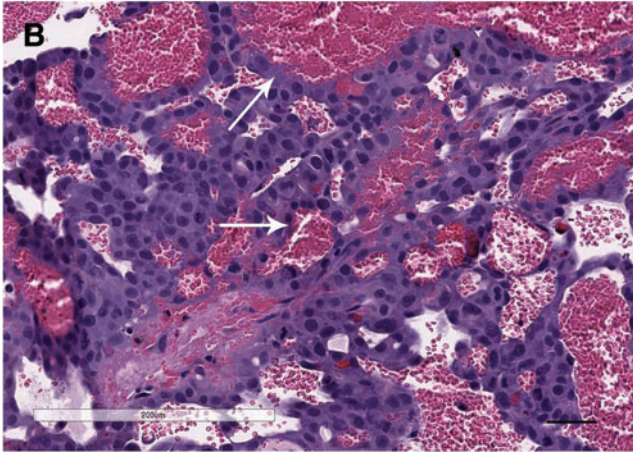

**SUPPLEMENTARY FIG. S6.** H and E staining of human xenografts. (A, B) H and E staining of human xenografts produced by the injection of the sorted CD34+ LCSC exhibits the typical histologic features of HLC; HLCs usually contain small or large foci of necrosis (A, double *black arrow*) and dilated blood vessels (B, *white arrow*). Scale bar: 100  $\mu$ m.
