# Supplementary material
Source: PubMed Central journal article supplement (PMC4499771)
Supplement: Supp_Figure7.pdf [file Supp_Figure7.pdf]

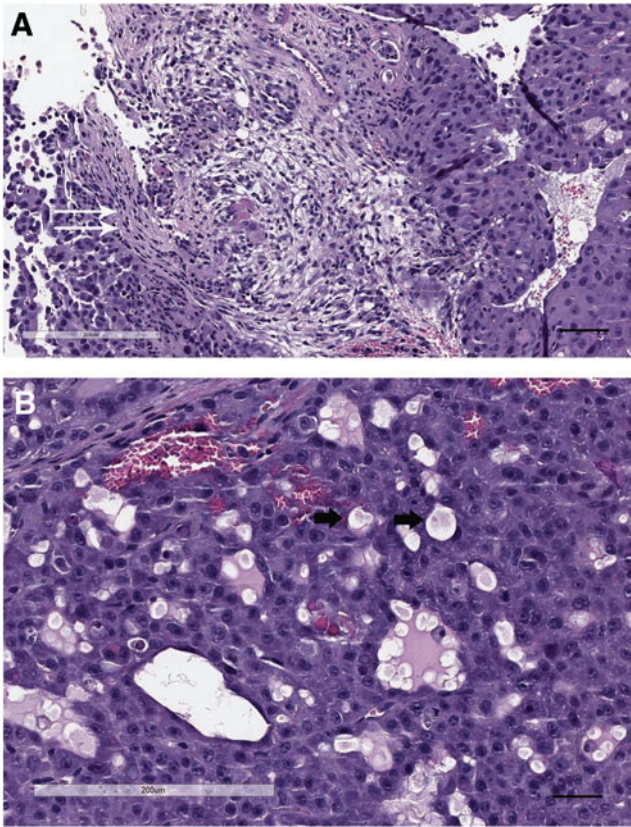

**SUPPLEMENTARY FIG. S7.** H and E staining of human xenografts. (A, B) H and E staining of human xenografts produced by the injection of the sorted CD34+ LCSC exhibits the typical histologic features of HLCs; HLCs typically grow in a nested pattern with large tumor nodules separated by thick fibrous bands (A, double *white arrow*). The neoplastic cells in HLCs can synthesize and store various components of hepatocytes, such as lipids (B, *black head arrow*) and other cytoplasmic constituents. Scale bar: 100  $\mu$ m.
