# Supplementary material
Source: PubMed Central journal article supplement (PMC4499771)
Supplement: Supp_Table1.pdf [file Supp_Table1.pdf]

SUPPLEMENTARY TABLE S1. LIST OF ANTIBODIES USED

| <i>Antigen</i>              | <i>Type</i>                                        | <i>Provider</i>        | <i>Application</i> |
|-----------------------------|----------------------------------------------------|------------------------|--------------------|
| <b>Primary antibodies</b>   |                                                    |                        |                    |
| Hep Par1                    | Mouse monoclonal                                   | Cell Marque            | IHC                |
| EpCAM                       | Rabbit polyclonal                                  | Cell Signaling         | IHC                |
| CK19                        | Rabbit polyclonal                                  | Abcam                  | IHC                |
| AFP                         | Rabbit polyclonal                                  | Dako                   | IHC                |
| $\alpha$ 1-AT               | Goat polyclonal                                    | Bethyl                 | IHC                |
| CD34                        | Mouse monoclonal                                   | Promab                 | IHC                |
| CD44                        | Rabbit polyclonal                                  | GeneTex                | IHC                |
| CD90                        | Rabbit polyclonal                                  | Epitomics              | IHC                |
| CD133                       | Rabbit polyclonal                                  | Sigma                  | IHC                |
| CD31                        | Mouse monoclonal                                   | Cell Signaling         | IHC                |
| EpCAM                       | Mouse monoclonal                                   | Cell Signaling         | IHC                |
| OV6                         | Mouse monoclonal                                   | R and D Systems        | IHC                |
| CD117                       | Rabbit polyclonal                                  | Abcam                  | IHC                |
| CK18                        | Mouse monoclonal                                   | Sigma                  | IHC                |
| SOX2                        | Rabbit polyclonal                                  | Sigma                  | IHC                |
|                             | Purified goat IgG                                  | Bethyl                 | Isotype control    |
|                             | Purified rabbit IgG                                | Bethyl                 | Isotype control    |
|                             | Purified mouse IgG                                 | Bethyl                 | Isotype control    |
| <b>Detection antibodies</b> |                                                    |                        |                    |
|                             | Donkey anti-goat IgG AlexaFluor <sup>®</sup> 488   | Jackson Immunoresearch | IHC                |
|                             | Donkey anti-rabbit IgG AlexaFluor <sup>®</sup> 488 | Jackson Immunoresearch | IHC                |
|                             | Donkey anti-mouse IgG AlexaFluor <sup>®</sup> 488  | Jackson Immunoresearch | IHC                |
|                             | Donkey anti-goat IgG AlexaFluor <sup>®</sup> 549   | Jackson Immunoresearch | IHC                |
|                             | Donkey anti-rabbit IgG AlexaFluor <sup>®</sup> 549 | Jackson Immunoresearch | IHC                |
|                             | Donkey anti-mouse IgG AlexaFluor <sup>®</sup> 549  | Jackson Immunoresearch | IHC                |
|                             | Donkey anti-goat IgG PE                            | R and D Systems        | Isotype control    |
|                             | Donkey anti-rabbit IgG PE                          | R and D Systems        | Isotype control    |
|                             | Donkey anti-mouse IgG PE                           | R and D Systems        | Isotype control    |

AFP, alpha-fetoprotein;  $\alpha$ 1-AT, alpha 1-antitrypsin; PE, phycoerythrin; IHC, immunohistochemistry; FC, flow cytometry; IgG, immunoglobulin G.
