# Supplementary material
Source: PubMed Central journal article supplement (PMC4499771)
Supplement: Supp_Table2.pdf [file Supp_Table2.pdf]

SUPPLEMENTARY TABLE S2. INFORMATION  
OF PRIMERS AND PROBES USED FOR QUANTITATIVE  
POLYMERASE CHAIN REACTION

| <i>Genes</i> | <i>Information or sequence of primers</i>                              |
|--------------|------------------------------------------------------------------------|
| Albumin      | Hs00609411_m1                                                          |
| GAPDH        | Hs99999905_m1                                                          |
| CK19         | Hs00761767_s1                                                          |
| CK7          | Hs00559840_m1                                                          |
| CD34         | Hs00990735_m1                                                          |
| AFP          | Hs00173490_m1                                                          |
| CD44         | Hs01075861_m1                                                          |
| CD133        | Hs01009250_m1                                                          |
| CD31         | Hs00169777_m1                                                          |
| EpCAM        | Hs00901885_m1                                                          |
| CD90         | Hs00264235_s1                                                          |
| OCT4         | Hs00742896_s1                                                          |
| SOX2         | Hs01053049_s1                                                          |
| NAONG        | Hs02387400_g1                                                          |
| c-Myc        | F: 5'-AGCTCATTCTGAAGAGGACTTGT-3'<br>R: 5'-TTGAGGCAGTTTACATTATGGCTA-3'  |
| Klf4         | F: 5'-GTGACTGGAAGTTGTGGATATCAG-3'<br>R: 5'-GCTTCCTTGTTTGGTACCTTTAGA-3' |
| Lin28        | F: 5'-CACGAGTTCAAAACACTATCCTGGCC-3'<br>R: 5'-TTGCTCTGTAACCAGGCTGGAG-3' |

GAPDH, glyceraldehyde-3-phosphate dehydrogenase.
